# Supplementary material for: The antiactivator FleN uses an allosteric mechanism to regulate σ54-dependent expression of flagellar genes in Pseudomonas aeruginosa
Source: PubMed Central journal article supplement — Sci Adv. 2021 Oct 20;7(43):eabj1792. doi: 10.1126/sciadv.abj1792 (PMC8528422; doi:10.1126/sciadv.abj1792), 2021-10-20
Supplement: sciadv.abj1792_sm.pdf [file sciadv.abj1792_sm.pdf]

Supplementary Materials for

**The antiactivator FleN uses an allosteric mechanism to regulate  $\sigma^{54}$ -dependent expression of flagellar genes in *Pseudomonas aeruginosa***

Chanchal, Priyajit Banerjee, Shikha Raghav, Hemant N. Goswami, Deepti Jain\*

\*Corresponding author. Email: [deepti@rcb.res.in](mailto:deepti@rcb.res.in)

Published 20 October 2021, *Sci. Adv.* 7, eabj1792 (2021)  
DOI: 10.1126/sciadv.abj1792

**This PDF file includes:**

Figs. S1 to S5

# Figure S1

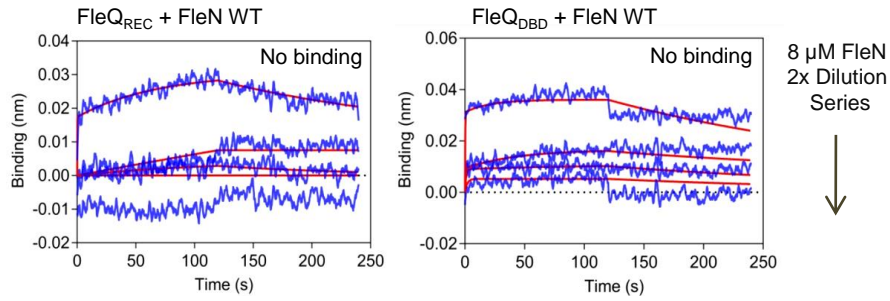

|                               | $K_D$ ( $\mu\text{M}$ ) | $K_{\text{on}}$ (1/Ms) | $K_{\text{dis}}$ (1/s) |
|-------------------------------|-------------------------|------------------------|------------------------|
| FleN WT + FleQ <sub>REC</sub> | No binding              | No binding             | No binding             |
| FleN WT + FleQ <sub>DBD</sub> | No binding              | No binding             | No binding             |

**Fig. S1 FleQ<sub>REC</sub> and FleQ<sub>DBD</sub> interaction with FleN.** Biolayer interferometry curves showing binding of FleQ<sub>REC</sub> and FleQ<sub>DBD</sub> with FleN WT at different concentrations. The curves in blue and red colours indicate experimental and fitting data respectively. No binding was observed in both the constructs of FleQ.

## Figure S2

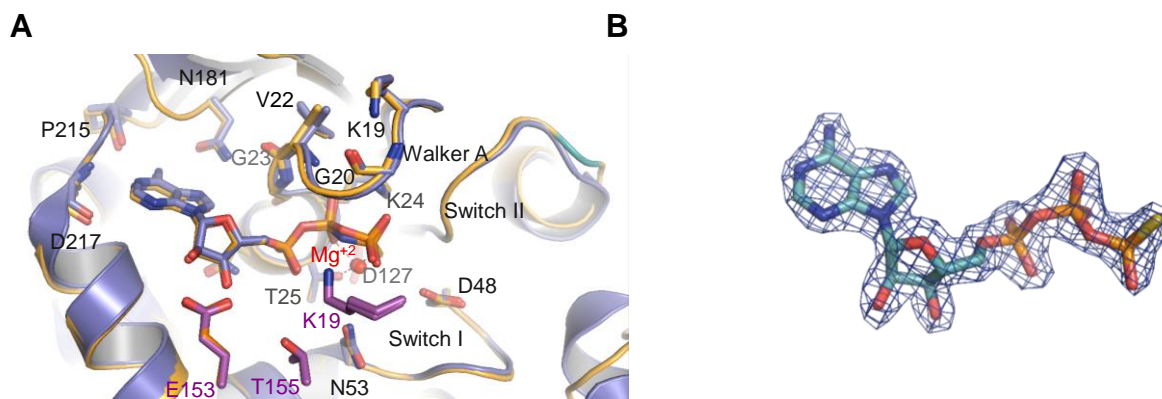

**Fig. S2 ATP binding pocket of FleN. (A)** Superimposition of ATP binding pocket from FleN-AMPPNP (slate, PDB: 5J1J) and FleN-ATP $\gamma$ S-FleQ<sub>AAA+</sub> (bright orange) structures. Residues in purple are from the adjacent monomer. **(B)** 2Fo - Fc map at 2.0 $\sigma$  showing ATP $\gamma$ S bound to the FleN in FleN-ATP $\gamma$ S-FleQ<sub>AAA+</sub> structure.

**Figure S3**

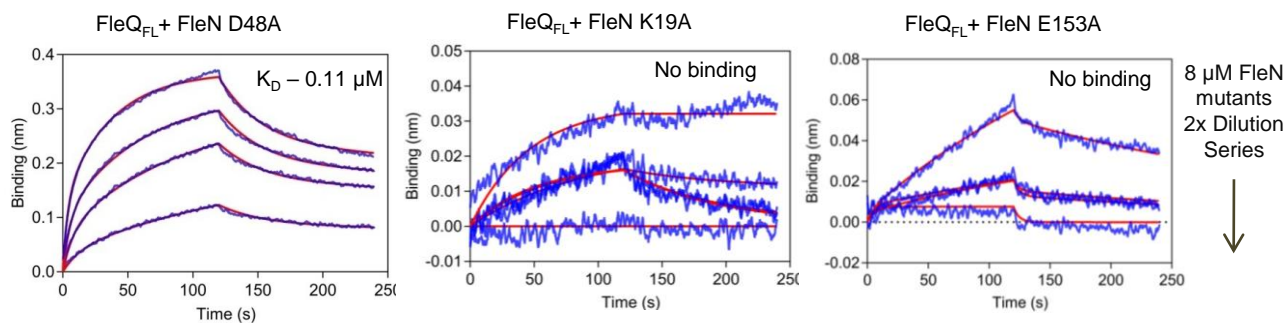

|                               | $K_D$ ( $\mu\text{M}$ ) | $K_{on}$ (1/Ms)            | $K_{dis}$ (1/s)            |
|-------------------------------|-------------------------|----------------------------|----------------------------|
| FleQ <sub>FL</sub> +FleN WT   | $0.34 \pm 0.03$         | $3.65\text{E}+03 \pm 0.80$ | $1.82\text{E}-03 \pm 0.94$ |
| FleQ <sub>FL</sub> +FleN K19A | No binding              | No binding                 | No binding                 |
| FleQ <sub>FL</sub> +FleN E153 | No binding              | No binding                 | No binding                 |
| FleQ <sub>FL</sub> +FleN D48A | $0.11 \pm 0.01$         | $7.0\text{E}+03 \pm 0.08$  | $0.8\text{E}-03 \pm 0.05$  |

**Fig. S3 Interaction between FleQ<sub>FL</sub> and ATP binding and hydrolysis mutants of FleN.** Biolayer Interferometry curves showing interaction between FleQ<sub>FL</sub> and FleN variants (FleN D48A, FleN K19A and FleN E153A) at different concentrations. The curves in blue and red colours indicate experimental and fitting data respectively. The dissociation constants ( $K_D$ ,  $\mu\text{M}$ ), rate of association ( $K_{on}$ , 1/Ms) and dissociation ( $K_{dis}$ , 1/s) are shown in the table along with standard deviations.

## Figure S4

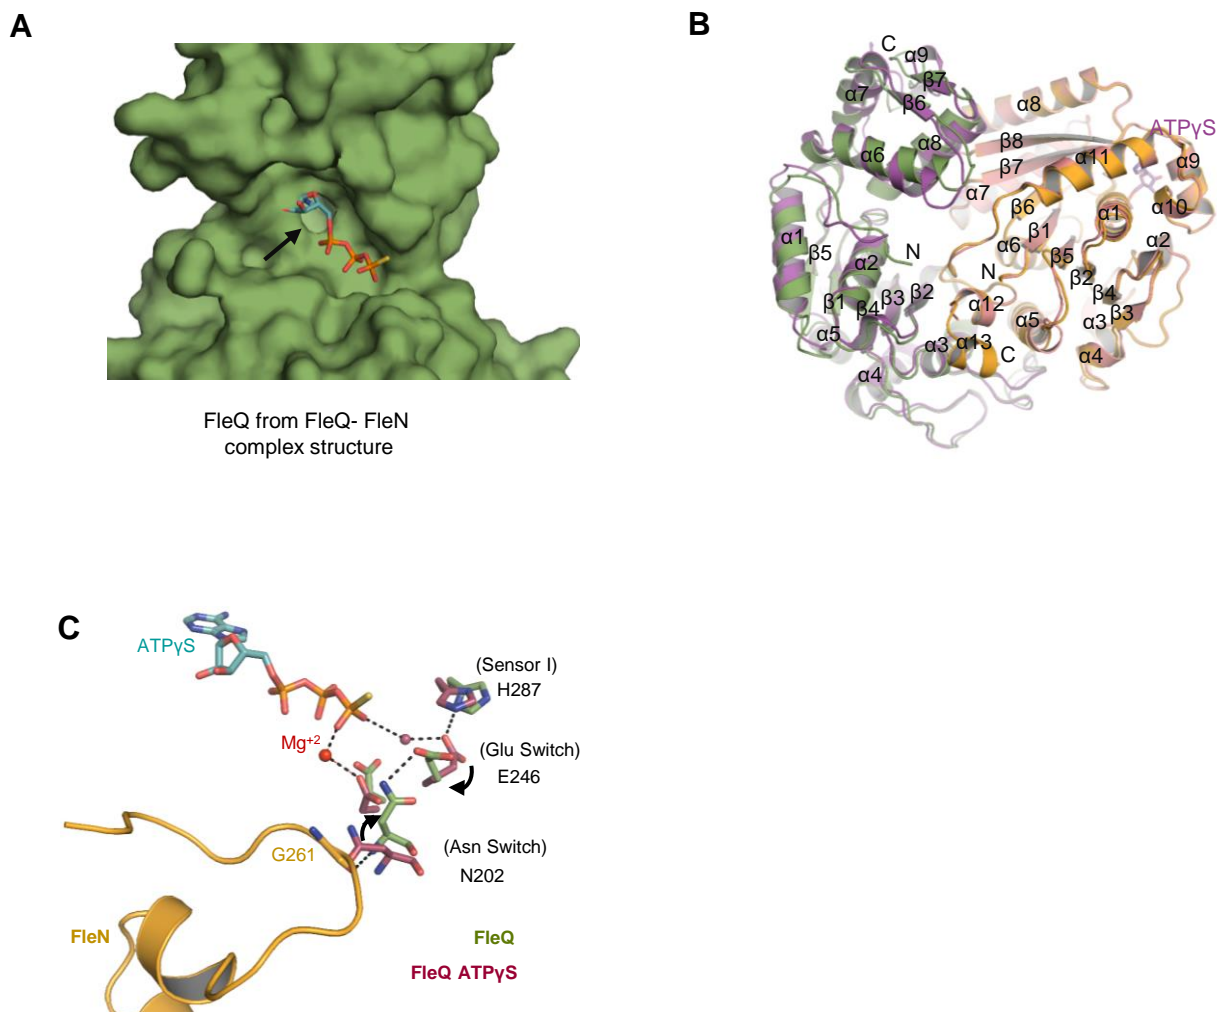

**Fig. S4 Superimposition of FleQ<sub>AAA+</sub> from ATPγS-Mg<sup>2+</sup> bound and FleN-ATPγS-FleQ<sub>AAA+</sub> structures.** (A) Surface representation of FleQ<sub>AAA+</sub> in FleN-ATPγS-FleQ<sub>AAA+</sub> structure (smudge), depicts that the ATP binding pocket (highlighted with black arrow) is too shallow to accommodate ATPγS in it and shows steric clash. (B) Superimposition of one half of the complex containing chain A of FleN (bright orange) and FleQ<sub>AAA+</sub> domain (smudge) on to second half containing chain B of FleN (salmon) and FleQ<sub>AAA+</sub> domain (purple) showing difference in the  $\alpha$ -helical subdomain. (C) Superimposition of residues of FleQ from FleN-ATPγS-FleQ<sub>AAA+</sub> and FleQ-ATPγS structures shows that G261 of FleN (bright orange) sterically clashes with N202 (Asn Switch) in ATPγS bound FleQ<sub>AAA+</sub> structure.

## Figure S5

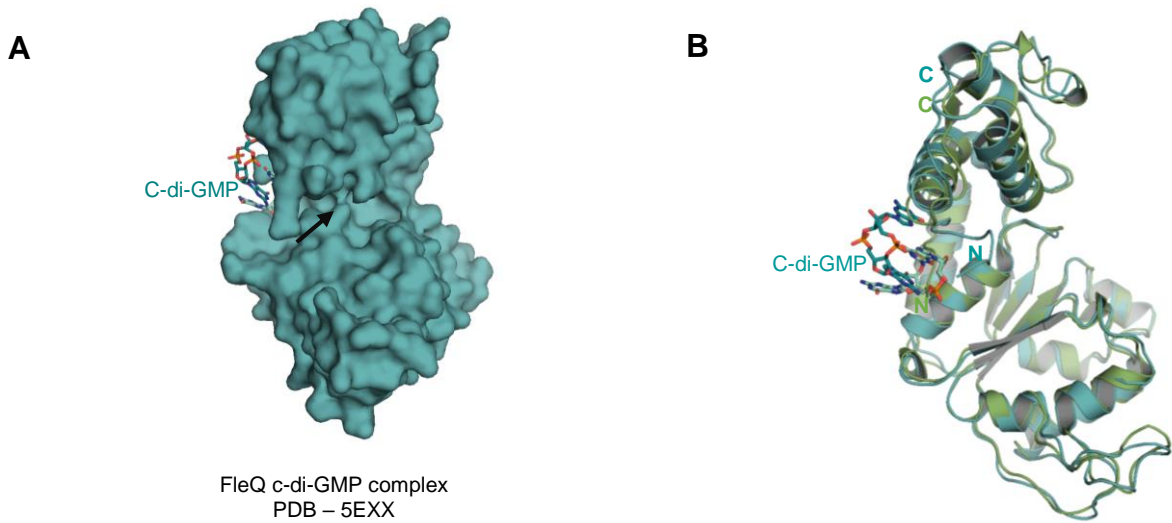

**Fig. S5 Structural comparison with c-di-GMP bound structure of FleQ<sub>AAA+</sub>.** (A) Surface representation of FleQ-c-di-GMP structure (green cyan, PDB: 5EXX) showing the conformation of ATP binding pocket (black arrow). (B) Structural superimposition of FleQ<sub>AAA+</sub> from c-di-GMP bound (green, PDB: 5EXX) and FleN-ATP $\gamma$ S-FleQ<sub>AAA+</sub> structures (cyan).
